# Supplementary material for: Genetic association between smoking and DLCO in idiopathic pulmonary fibrosis patients
Source: Springer Nature journal article supplement (doi:10.1186/s12890-024-02974-2), 2024-04-03
Supplement: MOESM2 [file 26939070]

**A**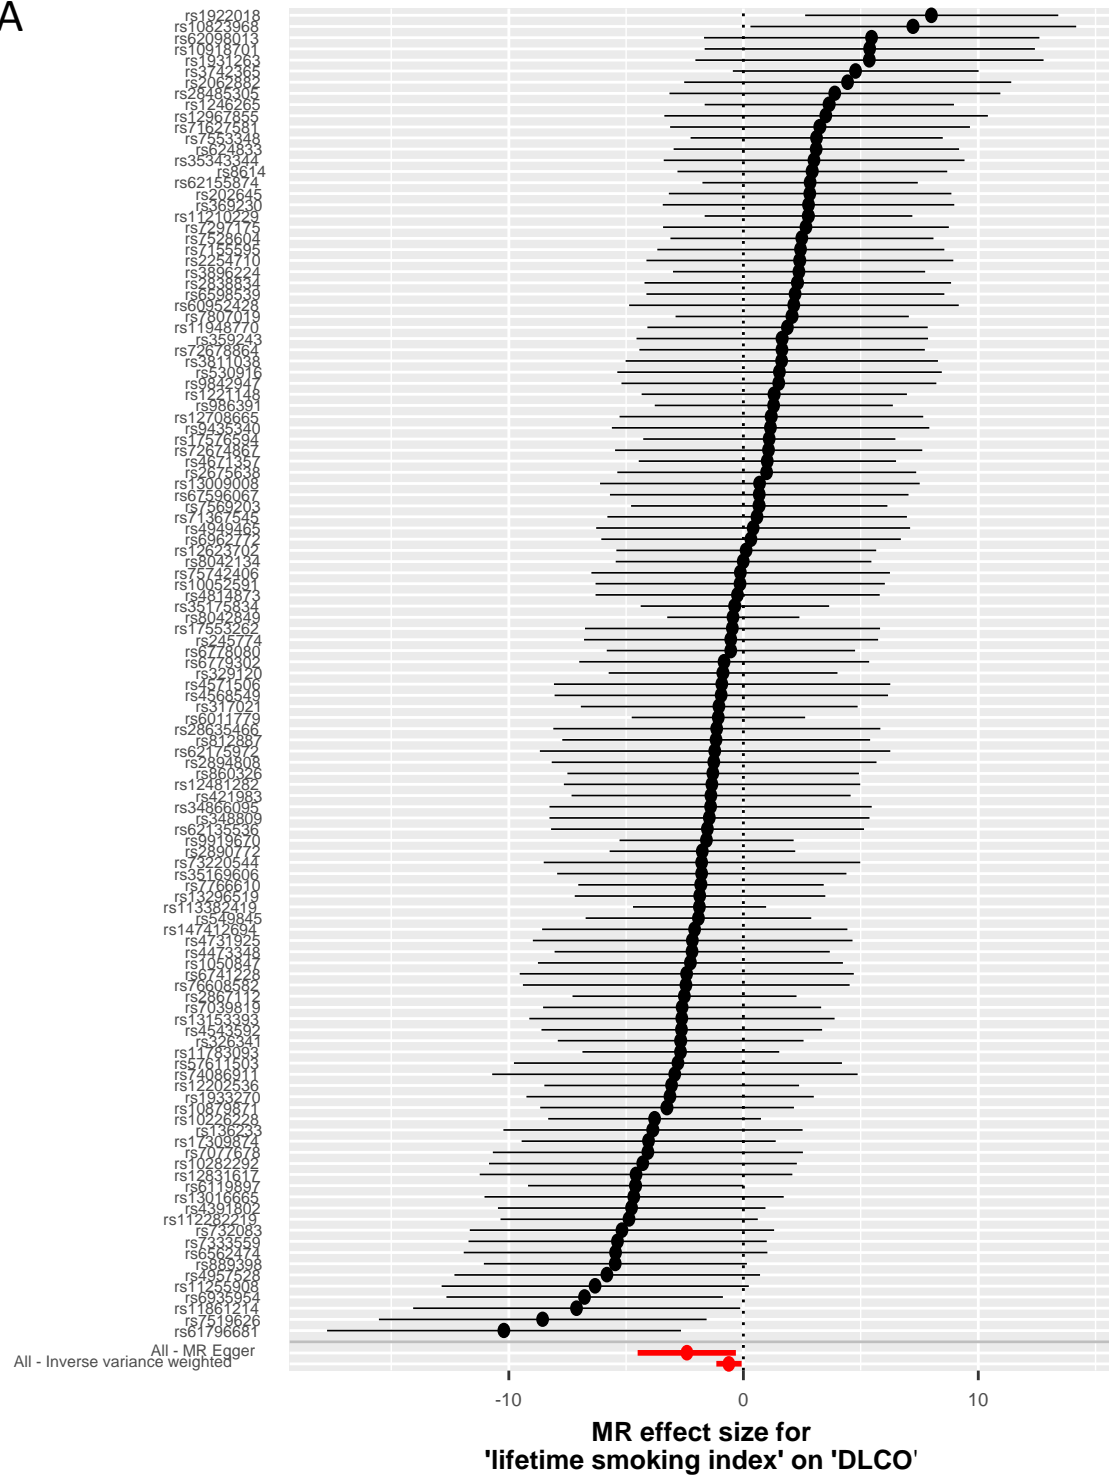**B**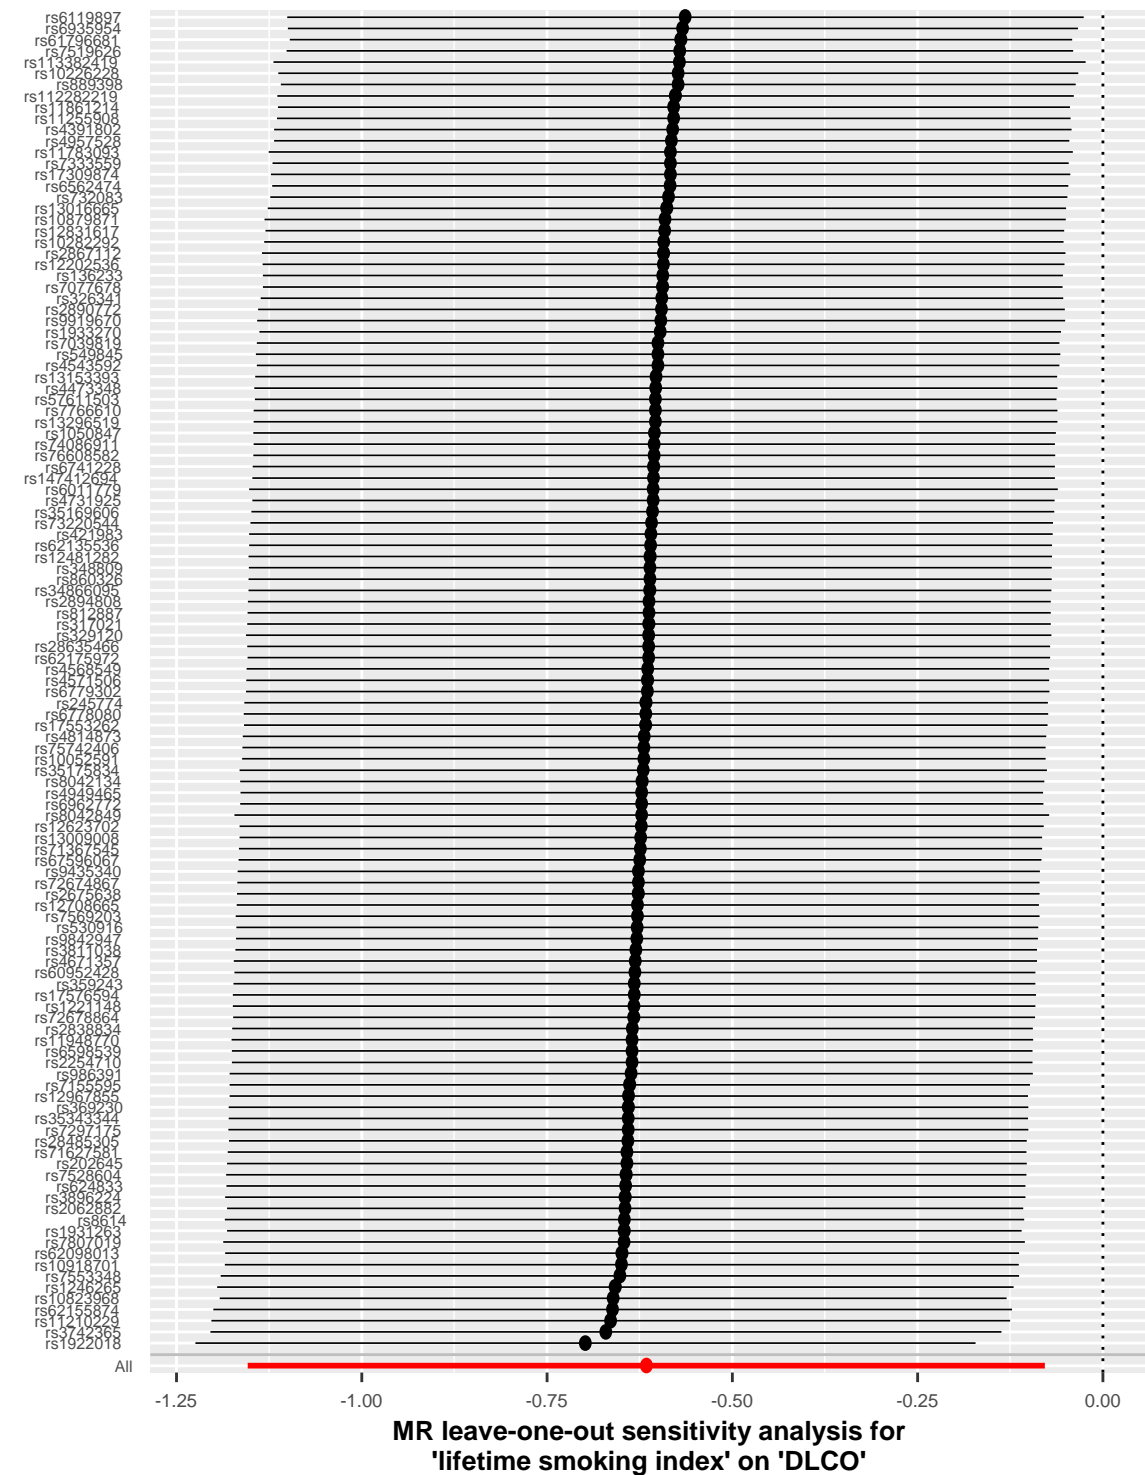

**Additional Figure.** Forest plot (A) and leave-one-out analysis (B) for lifetime smoking index on DLCO
